# Supplementary material for: Functional mother liquor reversed titanium species for the green synthesis of anatase-free hollow TS-1 with tunable titanium micro-environment via a kinetic-thermodynamic co-regulatory pathway
Source: Royal Society of Chemistry journal article supplement (doi:10.1039/d2qm00540a), 2022-01-01
Supplement: d2qm00540a1.pdf [file d2qm00540a1.pdf]

## Supporting information

### **Functional-mother-liquor reversed titanium species to green construct anatase-free hollow TS-1 with tunable titanium micro-environment via kinetics-thermodynamics co-regulatory pathway**

Yi Zhai,<sup>a</sup> Fumin Wang,<sup>a</sup> Xubin Zhang,<sup>a\*</sup> Guojun Lv,<sup>b</sup> Zhiguo Zhu,<sup>c</sup> Kaiwei Wang,<sup>a</sup>  
Zhibo Xu,<sup>a</sup> Linfang Jiang<sup>a</sup>

<sup>a</sup>*School of Chemical Engineering and Technology, Tianjin University, Tianjin 300350, P.R. China*

<sup>b</sup>*School of Environmental and Chemical Engineering, Jiangsu University of Science and Technology, Zhenjiang 212003, Jiangsu, P.R. China*

<sup>c</sup>*College of Chemistry and Chemical Engineering, Yantai University, Yantai 264005, Shandong, P.R. China*

\*Corresponding authors: [tjzxb@tju.edu.cn](mailto:tjzxb@tju.edu.cn) (Xubin Zhang)

Fax: +86 22789041; Tel: +86 22789041.

#### **Notes:**

The authors declare no competing financial interest.

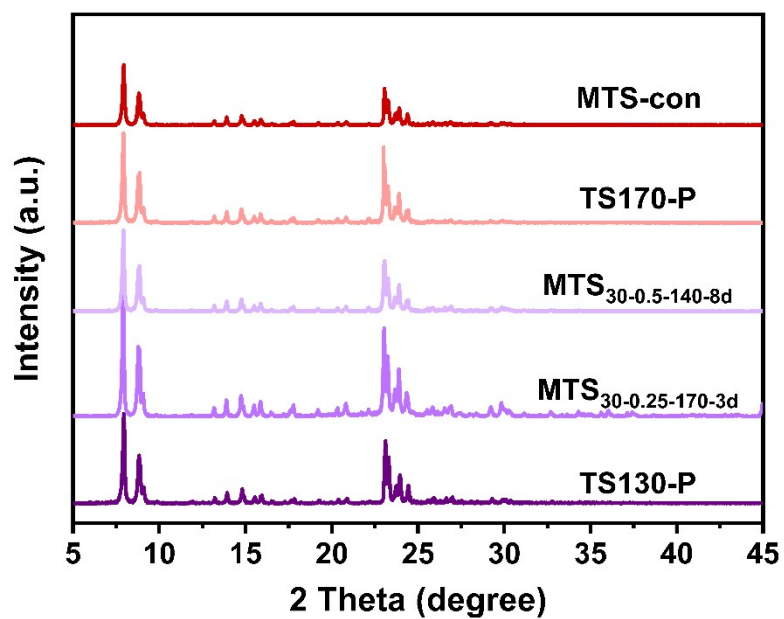

Figure S1. XRD patterns of recrystallized samples and parent samples

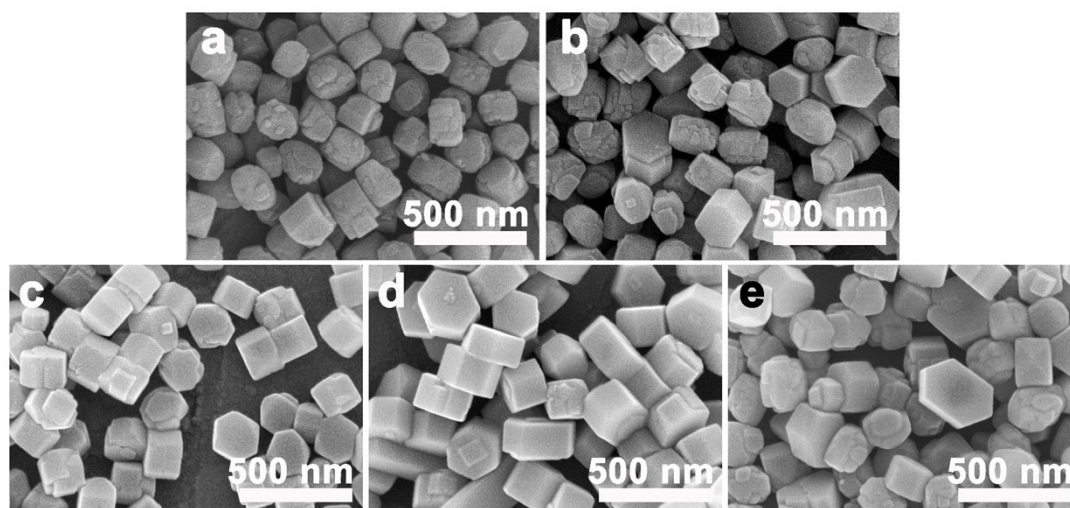

Figure S2. SEM images of recrystallized samples and parent samples: (a) TS130-P; (b) TS170-P; (c) MTS<sub>30-0.5-140-8d</sub>; (d) MTS<sub>30-0.25-170-3d</sub> and (e) MTS-con

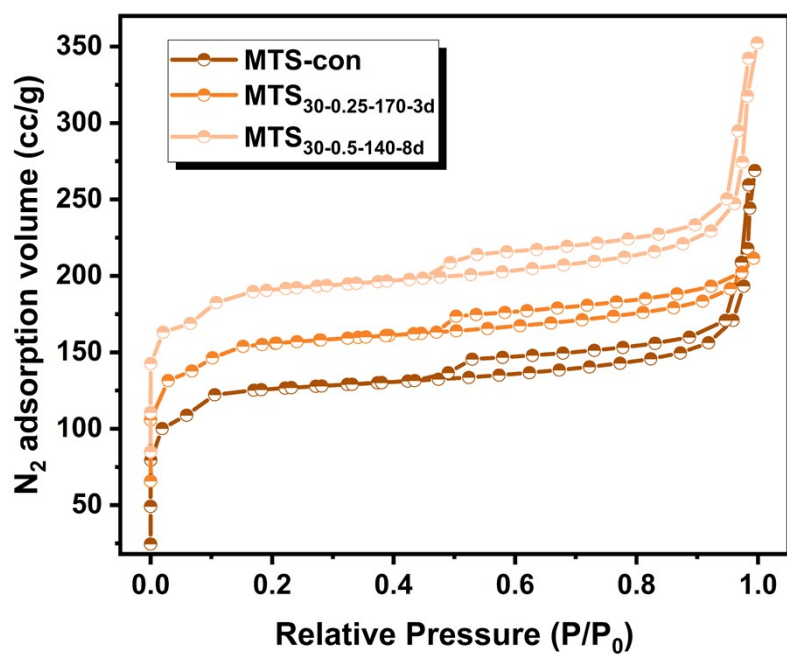

Figure S3. N<sub>2</sub> adsorption-desorption isotherms of recrystallized samples

Table S1. Textual parameters of synthesized zeolites at various synthetic conditions

| sample                         | $S_{\text{BET}}^{\text{a}}$<br>( $\text{m}^2/\text{g}$ ) | $S_{\text{ext}}^{\text{b}}$<br>( $\text{m}^2/\text{g}$ ) | $V_{\text{micro}}^{\text{b}}$<br>( $\text{cm}^3/\text{g}$ ) | $V_{\text{meso}}^{\text{c}}$<br>( $\text{cm}^3/\text{g}$ ) | $V_{\text{total}}^{\text{d}}$<br>( $\text{cm}^3/\text{g}$ ) |
|--------------------------------|----------------------------------------------------------|----------------------------------------------------------|-------------------------------------------------------------|------------------------------------------------------------|-------------------------------------------------------------|
| MTS <sub>30-0.125-170-3d</sub> | 382.16                                                   | 29.66                                                    | 0.182                                                       | 0.120                                                      | 0.292                                                       |
| MTS <sub>30-0.25-170-3d</sub>  | 398.72                                                   | 41.26                                                    | 0.182                                                       | 0.172                                                      | 0.351                                                       |
| MTS <sub>30-0.5-170-3d</sub>   | 419.74                                                   | 47.54                                                    | 0.183                                                       | 0.186                                                      | 0.359                                                       |
| MTS <sub>30-0.75-170-3d</sub>  | 419.60                                                   | 44.82                                                    | 0.180                                                       | 0.230                                                      | 0.393                                                       |
| MTS <sub>30-1-170-3d</sub>     | 400.15                                                   | 46.05                                                    | 0.184                                                       | 0.182                                                      | 0.346                                                       |
| MTS <sub>30-0.5-140-3d</sub>   | 427.54                                                   | 49.46                                                    | 0.185                                                       | 0.285                                                      | 0.452                                                       |
| MTS <sub>30-0.5-150-3d</sub>   | 399.41                                                   | 45.76                                                    | 0.182                                                       | 0.176                                                      | 0.349                                                       |
| MTS <sub>30-0.5-180-3d</sub>   | 376.31                                                   | 50.35                                                    | 0.162                                                       | 0.219                                                      | 0.371                                                       |
| MTS <sub>30-0.5-140-8d</sub>   | 420.74                                                   | 61.49                                                    | 0.174                                                       | 0.278                                                      | 0.452                                                       |
| MTS-con                        | 401.30                                                   | 43.47                                                    | 0.178                                                       | 0.242                                                      | 0.415                                                       |

<sup>a</sup>Measured from multipoint BET method; <sup>b</sup>Measured from t-plot method; <sup>c</sup> $V_{\text{meso}}$  calculated by using BJH method, <sup>d</sup>Determined from adsorbed volume at  $P/P_0=0.99$ .

Table S2. Various titanium content of different TS-1 samples

| Sample                         | Ti content <sup>a</sup><br>(wt%) | Framework Ti<br>content <sup>b</sup> (wt%) | Extra-framework<br>Ti content <sup>b</sup> (wt%) | Anatase<br>content <sup>b</sup> (wt%) |
|--------------------------------|----------------------------------|--------------------------------------------|--------------------------------------------------|---------------------------------------|
| MTS <sub>30-0.125-170-3d</sub> | 1.67                             | 1.11                                       | 0.56                                             | 0.00                                  |
| MTS <sub>30-0.25-170-3d</sub>  | 1.42                             | 0.79                                       | 0.63                                             | 0.00                                  |
| MTS <sub>30-0.5-170-3d</sub>   | 1.50                             | 0.62                                       | 0.65                                             | 0.23                                  |
| MTS <sub>30-0.75-170-3d</sub>  | 1.74                             | 0.83                                       | 0.52                                             | 0.39                                  |
| MTS <sub>30-1-170-3d</sub>     | 1.25                             | 0.74                                       | 0.33                                             | 0.18                                  |
| MTS <sub>30-0.5-140-3d</sub>   | 1.11                             | 0.40                                       | 0.71                                             | 0.00                                  |
| MTS <sub>30-0.5-150-3d</sub>   | 1.14                             | 0.44                                       | 0.53                                             | 0.17                                  |
| MTS <sub>30-0.5-180-3d</sub>   | 1.79                             | 0.96                                       | 0.00                                             | 0.83                                  |
| MTS <sub>30-0.5-140-8d</sub>   | 1.24                             | 0.57                                       | 0.67                                             | 0.00                                  |
| TS130-P                        | 1.19                             | 0.86                                       | 0.33                                             | 0.00                                  |
| TS170-P                        | 1.70                             | 1.35                                       | 0.35                                             | 0.00                                  |
| MTS-con                        | 2.06                             | 1.37                                       | 0.45                                             | 0.24                                  |

<sup>a</sup>Measured by ICP; <sup>b</sup>determined by ICP and UV-vis spectra.

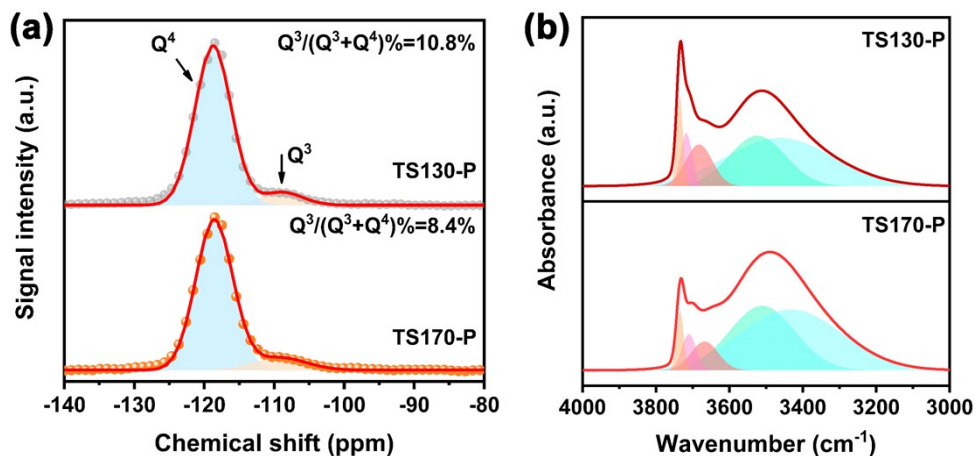

Figure S4. (a) Si MAS NMR spectra of parent zeolites and (b) FT-IR spectra in hydroxyl vibration region of parent zeolites

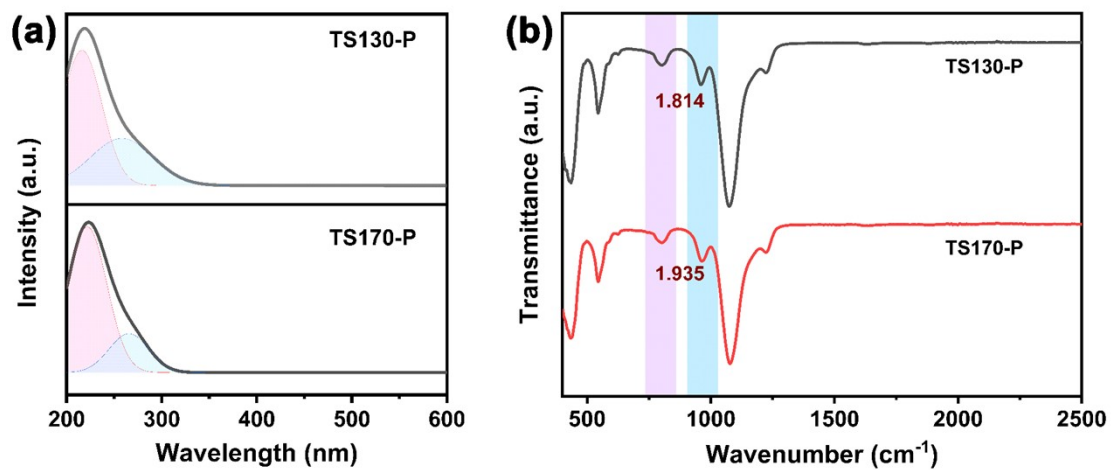

Figure S5. UV-vis spectra and FT-IR spectra of parent samples (TS130-P and TS170-P)

Table S3. Utilization results of different TS-1 zeolites

| Sample                         | Parent zeolite<br>weight (g) | Recrystallized<br>sample weight (g) | Species Utilization<br>(%) |
|--------------------------------|------------------------------|-------------------------------------|----------------------------|
| MTS <sub>30-0.125-170-3d</sub> | 0.125                        | 0.382                               | 83.3                       |
| MTS <sub>30-0.25-170-3d</sub>  | 0.25                         | 0.565                               | 86.8                       |
| MTS <sub>30-0.5-170-3d</sub>   | 0.50                         | 0.801                               | 86.0                       |
| MTS <sub>30-0.75-170-3d</sub>  | 0.75                         | 0.993                               | 82.4                       |
| MTS <sub>30-1-170-3d</sub>     | 1.00                         | 1.210                               | 80.3                       |
| MTS <sub>30-0.5-140-3d</sub>   | 0.50                         | 0.582                               | 72.4                       |
| MTS <sub>30-0.5-150-3d</sub>   | 0.50                         | 0.620                               | 74.8                       |
| MTS <sub>30-0.5-180-3d</sub>   | 0.50                         | 0.756                               | 83.2                       |
| MTS <sub>30-0.5-140-8d</sub>   | 0.50                         | 0.679                               | 78.4                       |
| MTS-con                        | 0.25                         | 0.225                               | 83.4                       |
| TS130-P                        | --                           | --                                  | 67.3                       |
| TS170-P                        | --                           | --                                  | 85.0                       |

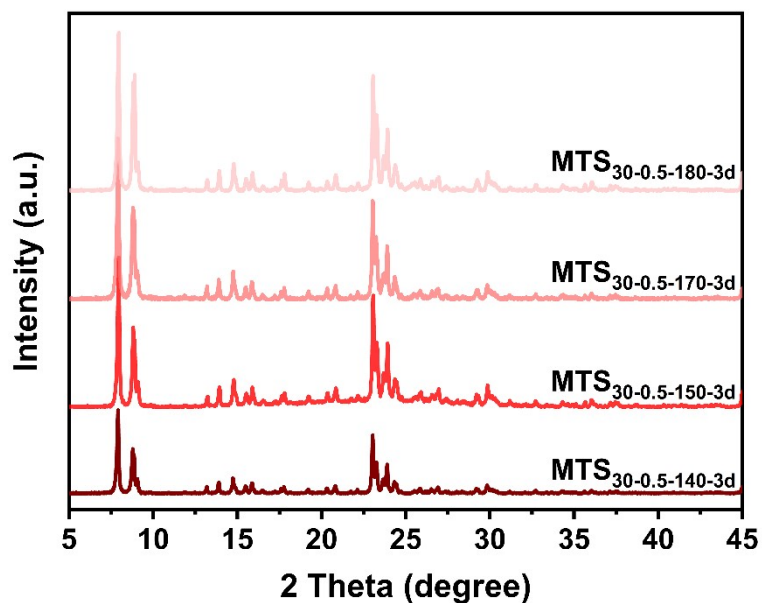

Figure S6. XRD patterns of post-treated samples at different recrystallization temperatures

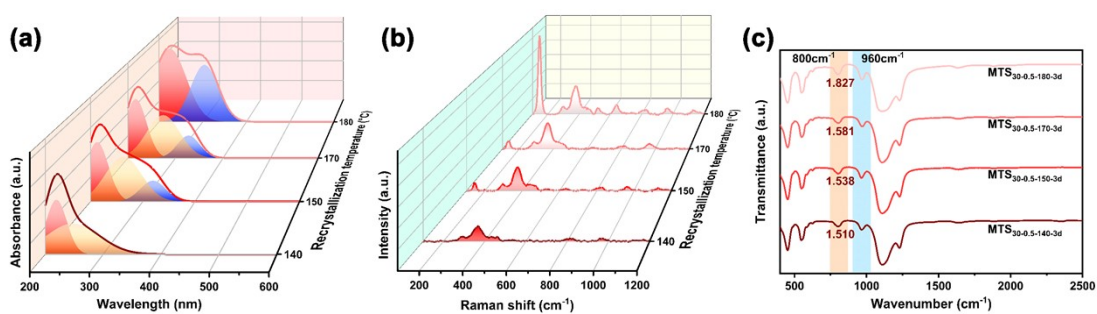

Figure S7. (a) UV-vis spectra, (b) Raman spectra and (c) FT-IR spectra of post-treated samples at different recrystallization temperatures.



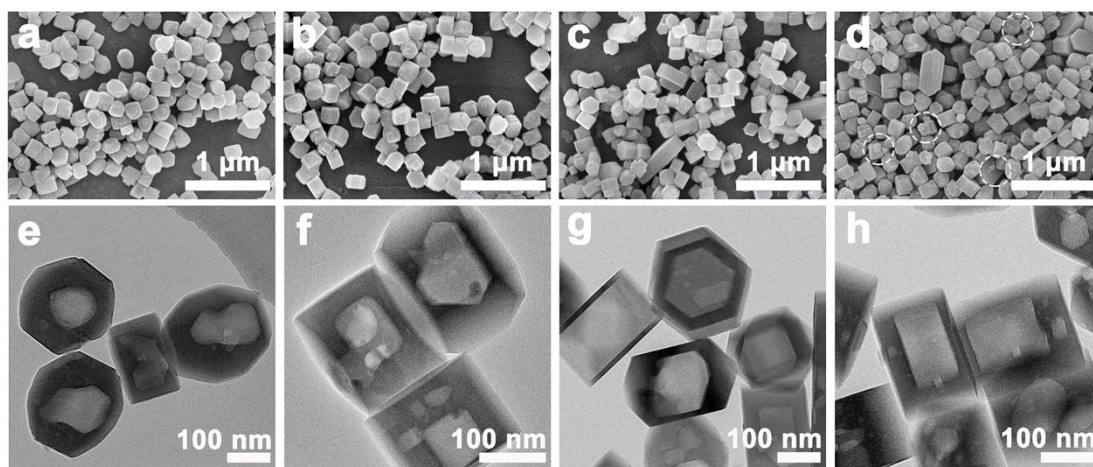

Figure S8. SEM and TEM images of post-treated samples at different recrystallization temperatures: (a, e) 413 K; (b, f) 423 K; (c, g) 443 K and (d, h) 453 K

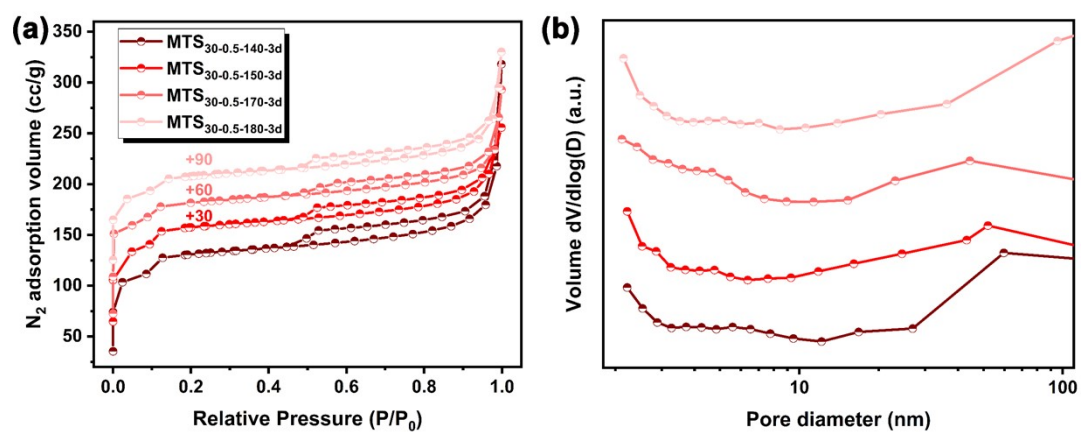

Figure S9.  $N_2$  adsorption-desorption isotherms and pore size distributions of post-treated samples at different recrystallization temperatures

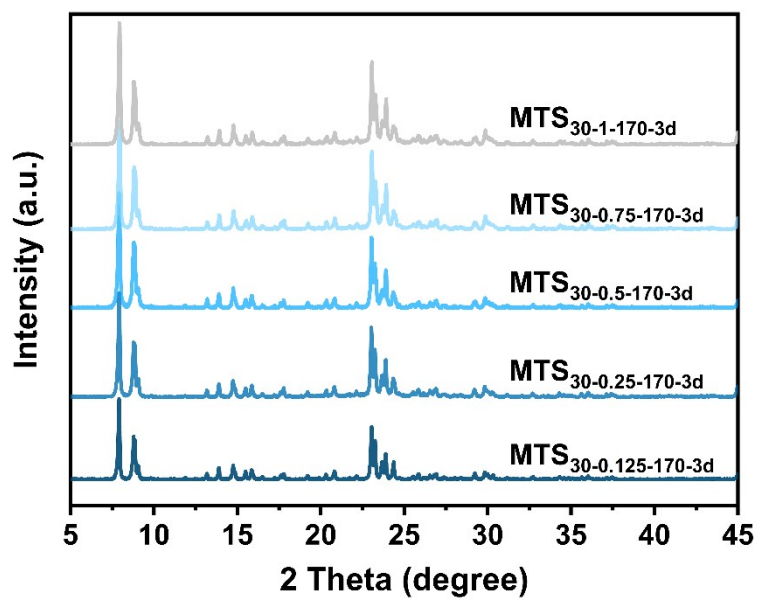

Figure S10. XRD patterns of post-treated samples at different liquid-to-solid ratios

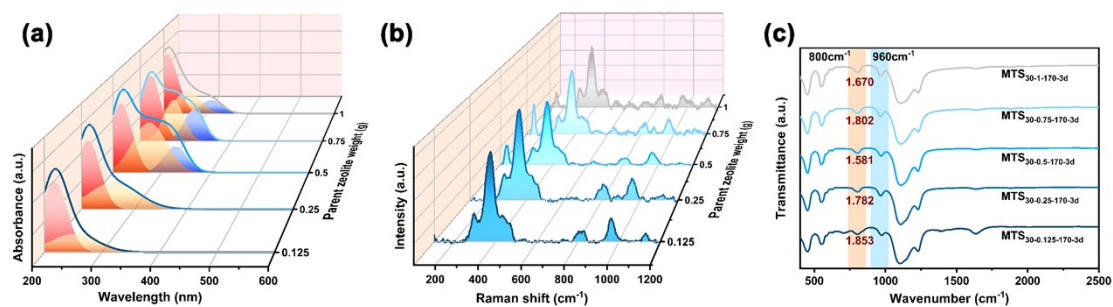

Figure S11. (a) UV-vis spectra, (b) Raman spectra and (c) FT-IR spectra of post-treated samples at different liquid-to-solid ratios.

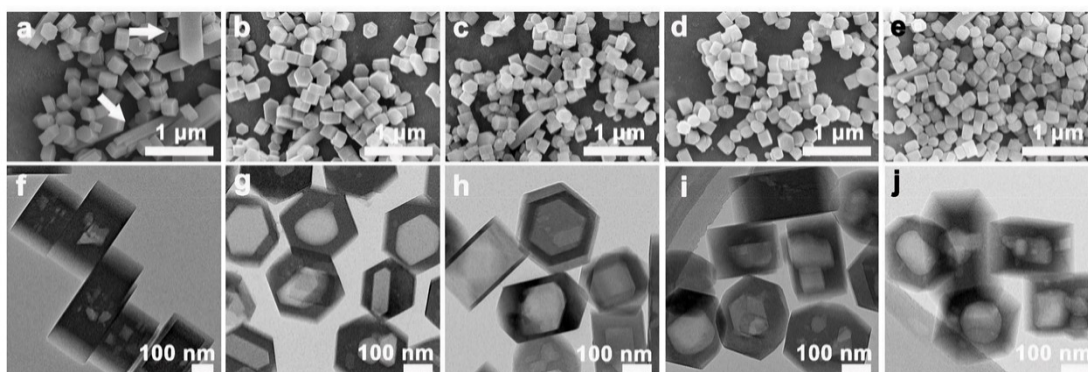

Figure S12. SEM and TEM images of post-treated samples at different liquid-to-solid ratios: (a, f) 160 ( $\text{MTS}_{30-0.125-170-3d}$ ); (b, g) 80 ( $\text{MTS}_{30-0.25-170-3d}$ ); (c, h) 40 ( $\text{MTS}_{30-0.5-170-3d}$ ); (d, i) 27 ( $\text{MTS}_{30-0.75-170-3d}$ ) and (e, j) 20 ( $\text{MTS}_{30-1-170-3d}$ )

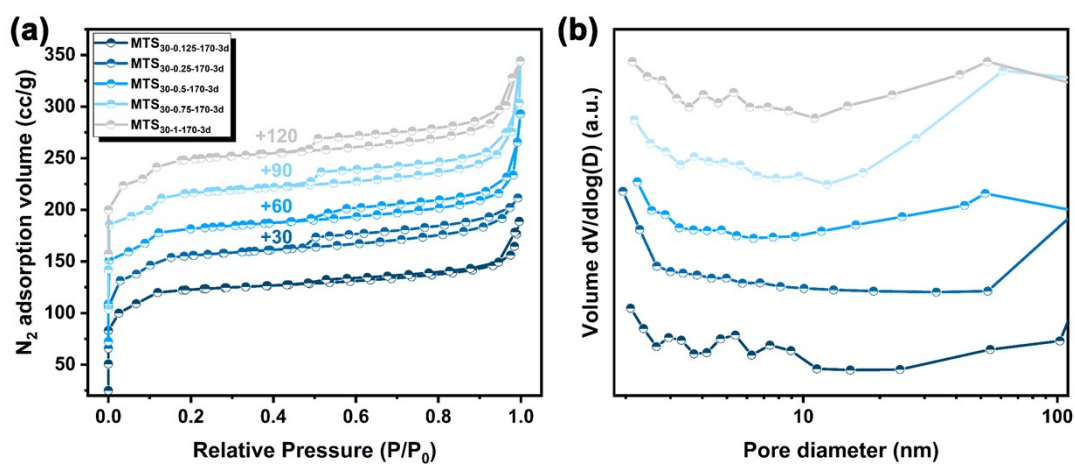

Figure S13.  $\text{N}_2$  adsorption-desorption isotherms and pore size distributions of post-treated samples at different liquid-to-solid ratios

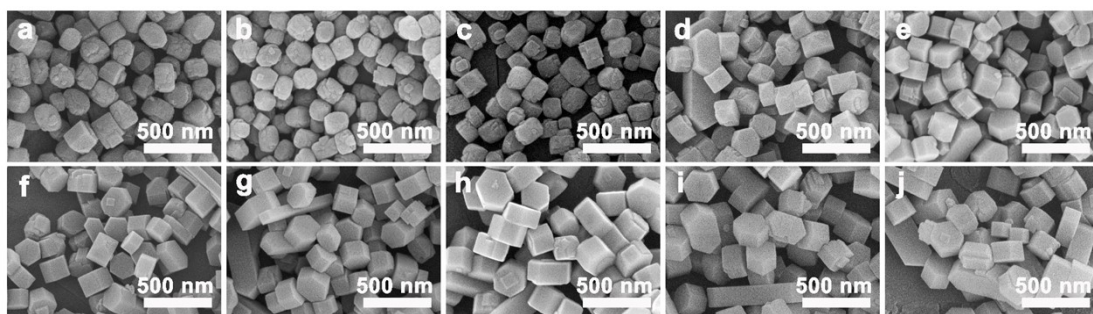

Figure S14. SEM images of  $\text{MTS}_{30-0.25-170-xh}$  samples:  $x=(a) 0$ ; (b) 2; (c) 6; (d) 12; (e) 24; (f) 48; (g) 60; (h) 72; (i) 84; (j) 96

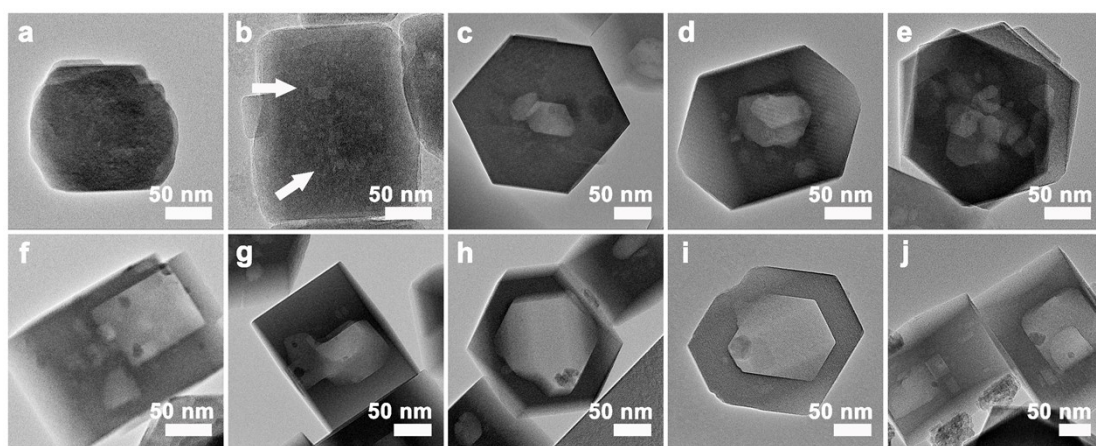

Figure S15. TEM images of  $\text{MTS}_{30-0.25-170-xh}$  samples:  $x= (a) 0$ ; (b) 2; (c) 6; (d) 12; (e) 24; (f) 48; (g) 60; (h) 72; (i) 84; (j) 96

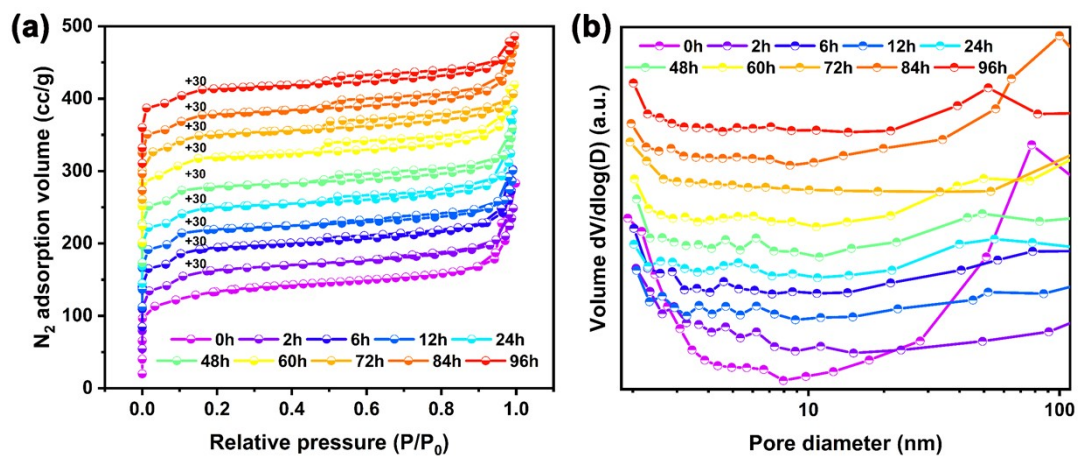

Figure S16. N<sub>2</sub> adsorption-desorption isotherms and pore size distributions of MTS<sub>30</sub>-

0.25-170-xh samples at different time points

Table S4. Textual parameters of MTS<sub>30-0.25-170-xh</sub> at different time points

| sample                         | S <sub>BET</sub> <sup>a</sup><br>(m <sup>2</sup> /g) | S <sub>ext</sub> <sup>b</sup><br>(m <sup>2</sup> /g) | V <sub>micro</sub> <sup>b</sup><br>(cm <sup>3</sup> /g) | V <sub>meso</sub> <sup>c</sup><br>(cm <sup>3</sup> /g) | V <sub>total</sub> <sup>d</sup><br>(cm <sup>3</sup> /g) |
|--------------------------------|------------------------------------------------------|------------------------------------------------------|---------------------------------------------------------|--------------------------------------------------------|---------------------------------------------------------|
| TS130-P                        | 435.67                                               | 35.44                                                | 0.198                                                   | 0.110                                                  | 0.268                                                   |
| MTS <sub>30-0.25-170-2h</sub>  | 426.48                                               | 41.97                                                | 0.192                                                   | 0.159                                                  | 0.334                                                   |
| MTS <sub>30-0.25-170-6h</sub>  | 434.66                                               | 46.90                                                | 0.189                                                   | 0.196                                                  | 0.375                                                   |
| MTS <sub>30-0.25-170-12h</sub> | 420.72                                               | 49.37                                                | 0.188                                                   | 0.204                                                  | 0.388                                                   |
| MTS <sub>30-0.25-170-24h</sub> | 419.25                                               | 50.47                                                | 0.187                                                   | 0.253                                                  | 0.435                                                   |
| MTS <sub>30-0.25-170-48h</sub> | 409.44                                               | 42.35                                                | 0.186                                                   | 0.206                                                  | 0.372                                                   |
| MTS <sub>30-0.25-170-60h</sub> | 406.96                                               | 38.12                                                | 0.184                                                   | 0.181                                                  | 0.370                                                   |
| MTS <sub>30-0.25-170-72h</sub> | 398.72                                               | 41.26                                                | 0.182                                                   | 0.172                                                  | 0.351                                                   |
| MTS <sub>30-0.25-170-84h</sub> | 404.71                                               | 43.21                                                | 0.185                                                   | 0.173                                                  | 0.346                                                   |
| MTS <sub>30-0.25-170-96h</sub> | 399.66                                               | 38.65                                                | 0.179                                                   | 0.183                                                  | 0.350                                                   |

<sup>a</sup>Measured from multipoint BET method; <sup>b</sup>Measured from t-plot method; <sup>c</sup>V<sub>meso</sub> calculated by using BJH method, <sup>d</sup>Determined from adsorbed volume at P/P<sub>0</sub>=0.99.

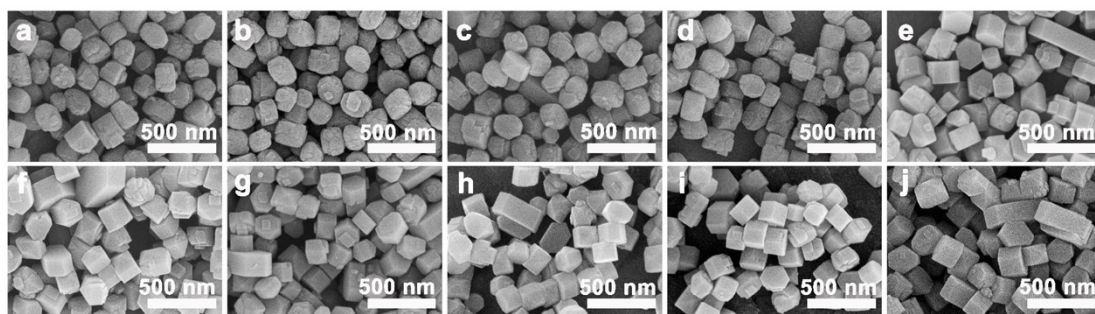

Figure S17. SEM images of  $\text{MTS}_{30-0.5-170-xh}$  samples:  $x=$  (a) 0; (b) 2; (c) 6; (d) 12; (e) 24; (f) 48; (g) 60; (h) 72; (i) 84; (j) 96

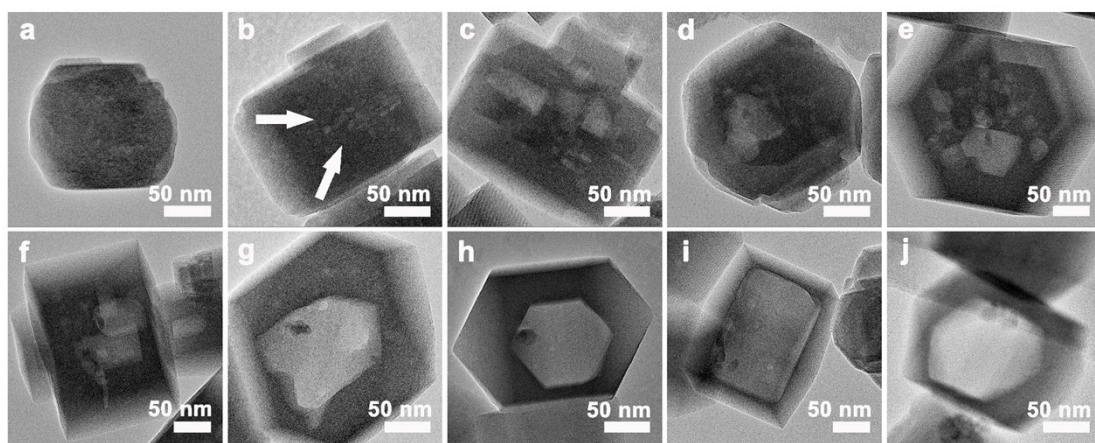

Figure S18. TEM images of  $\text{MTS}_{30-0.5-170-xh}$  samples:  $x=$  (a) 0; (b) 2; (c) 6; (d) 12; (e) 24; (f) 48; (g) 60; (h) 72; (i) 84; (j) 96

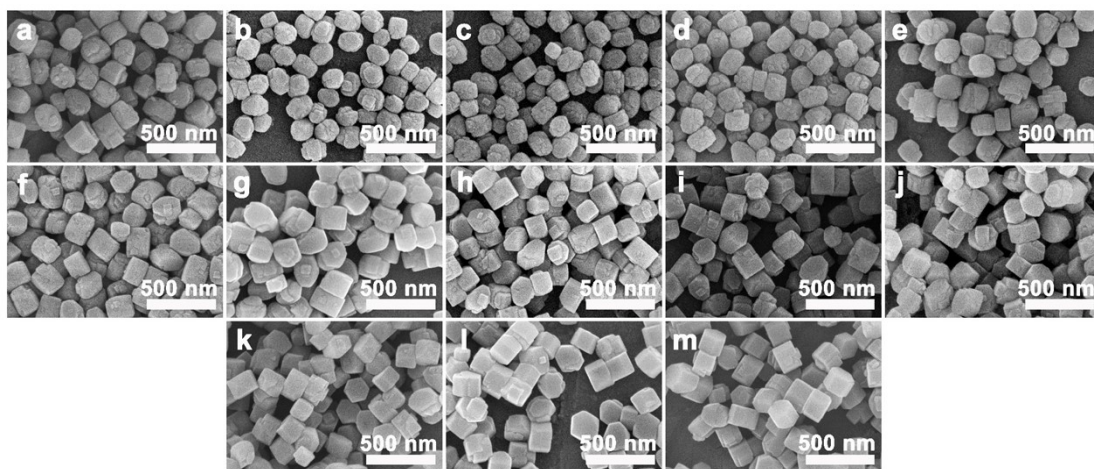

Figure S19. SEM images of MTS<sub>30-0.5-140-xh</sub> samples: (a) 0; (b) 2; (c) 6; (d) 12; (e) 24; (f) 48; (g) 72; (h) 96; (i) 120; (j) 144; (k) 168; (l) 192 and (m) 216

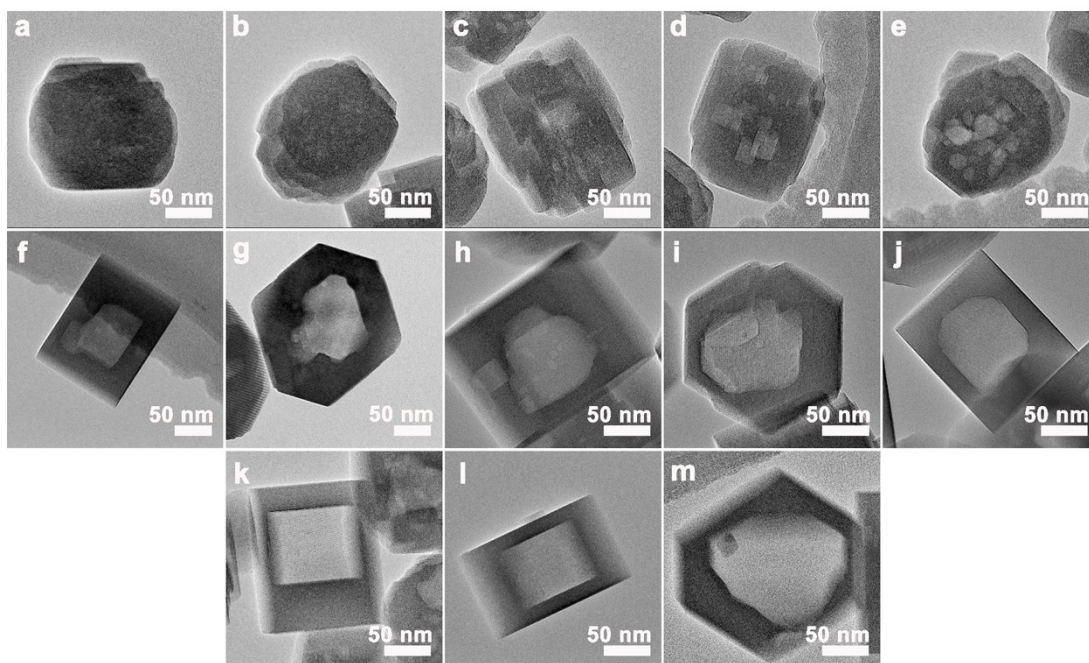

Figure S20. TEM images of MTS<sub>30-0.5-140-xh</sub> samples: (a) 0; (b) 2; (c) 6; (d) 12; (e) 24; (f) 48; (g) 72; (h) 96; (i) 120; (j) 144; (k) 168; (l) 192 and (m) 216



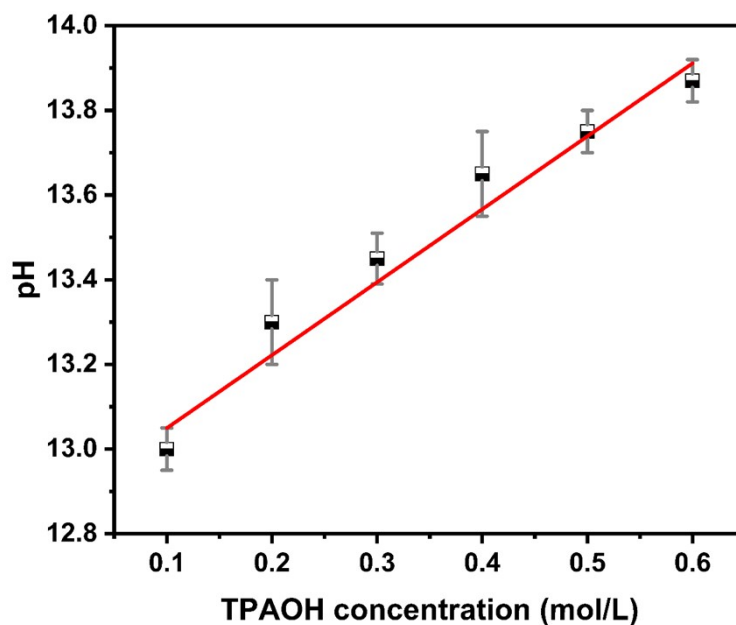

Figure S21. Fitting curve of pH and TPAOH solution concentration

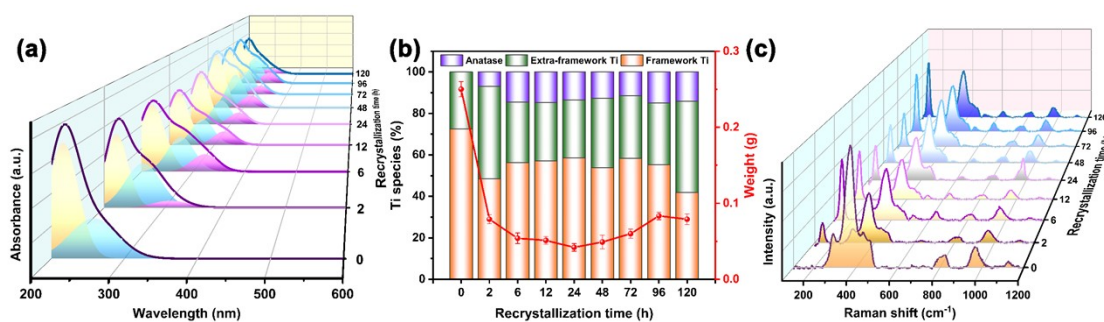

Figure S22. (a) UV-vis spectra, (b) distributions of titanium species and weight varying (c) Raman spectra of recrystallized TS130-P samples by 0.2 M TPAOH at different time points

Table S5. Catalysis test results of different TS-1 zeolites

| catalyst                       | Ti content <sup>a</sup><br>(wt%) | Ti content <sup>b</sup><br>(wt%) | 1-Hexene <sup>c</sup> |                 |        | Phenol <sup>d</sup> |                 |     |
|--------------------------------|----------------------------------|----------------------------------|-----------------------|-----------------|--------|---------------------|-----------------|-----|
|                                |                                  |                                  | Conv.<br>(%)          | Selectivity (%) |        | Conv<br>(%)         | Selectivity (%) |     |
|                                |                                  |                                  |                       | Epoxide         | Others |                     | DHB (HQ/CAT)    | BQ  |
| MTS <sub>30-0.125-170-3d</sub> | 1.11                             | 1.33                             | 46.1                  | 97.4            | 2.6    | 22.2                | 94.1(46.4/47.7) | 5.9 |
| MTS <sub>30-0.25-170-3d</sub>  | 0.79                             | 1.40                             | 48.8                  | 97.9            | 2.1    | 27.8                | 98.0(48.0/50.0) | 2.0 |
| MTS <sub>30-0.5-170-3d</sub>   | 0.62                             | 1.17                             | 42.5                  | 98.7            | 1.3    | 22.5                | 98.5(48.1/50.4) | 1.5 |
| MTS <sub>30-0.75-170-3d</sub>  | 0.83                             | 0.92                             | 39.6                  | 99.5            | 0.5    | 19.9                | 97.6(49.8/47.8) | 2.4 |
| MTS <sub>30-1-170-3d</sub>     | 0.74                             | 0.90                             | 40.3                  | 95.5            | 4.5    | 23.7                | 98.8(50.8/48.0) | 1.2 |
| MTS <sub>30-0.5-140-3d</sub>   | 0.40                             | 0.85                             | 37.9                  | 99.4            | 0.6    | 16.3                | 98.7(45.0/53.7) | 1.3 |
| MTS <sub>30-0.5-150-3d</sub>   | 0.44                             | 1.00                             | 41.7                  | 98.9            | 1.1    | 19.4                | 98.6(48.1/50.5) | 1.4 |
| MTS <sub>30-0.5-180-3d</sub>   | 0.96                             | 1.24                             | 44.8                  | 99.8            | 0.2    | 24.3                | 94.7(47.8/46.9) | 5.3 |
| TS130-P                        | 0.86                             | 0.95                             | 40.5                  | 99.1            | 0.9    | 19.7                | 99.1(45.8/53.3) | 0.9 |

<sup>a</sup>Framework Ti contents were determined by ICP and UV-vis; <sup>b</sup>Surface non-anatase content were determined by EDS and UV-vis; <sup>c</sup>Reaction conditions: catalyst 50 mg, 1-hexene 10 mmol, H<sub>2</sub>O<sub>2</sub> 10 mmol (molar ratio of hexene: H<sub>2</sub>O<sub>2</sub>=1:1), methanol 10 mL, temp 333 K, time 4 h; <sup>d</sup>Reaction conditions: catalyst 100 mg, phenol 10 mmol, H<sub>2</sub>O<sub>2</sub> 3.3 mmol (molar ratio of phenol: H<sub>2</sub>O<sub>2</sub>=3:1), water 10 mL, temp 333 K, time 6 h.

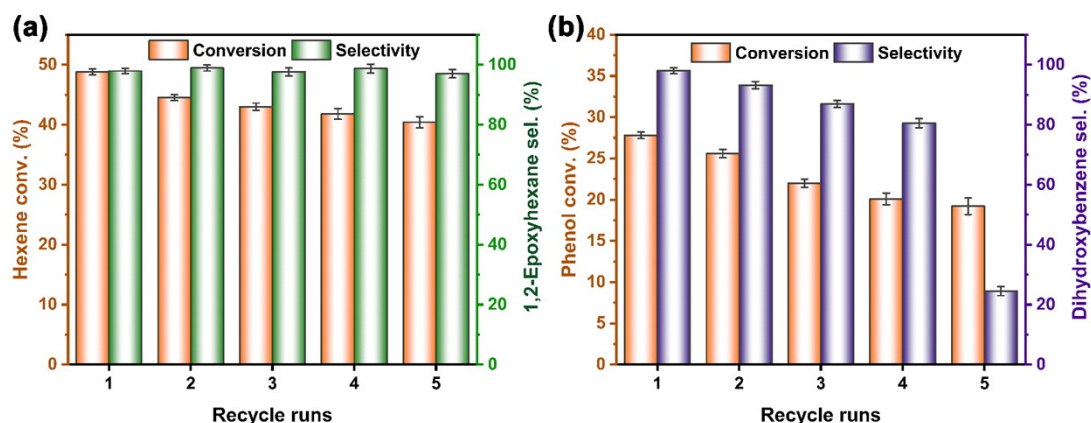

Figure S23. Recycle tests of MTS<sub>30-0.25-170-3d</sub>: (a) 1-hexene epoxidation and (b) phenol hydroxylation

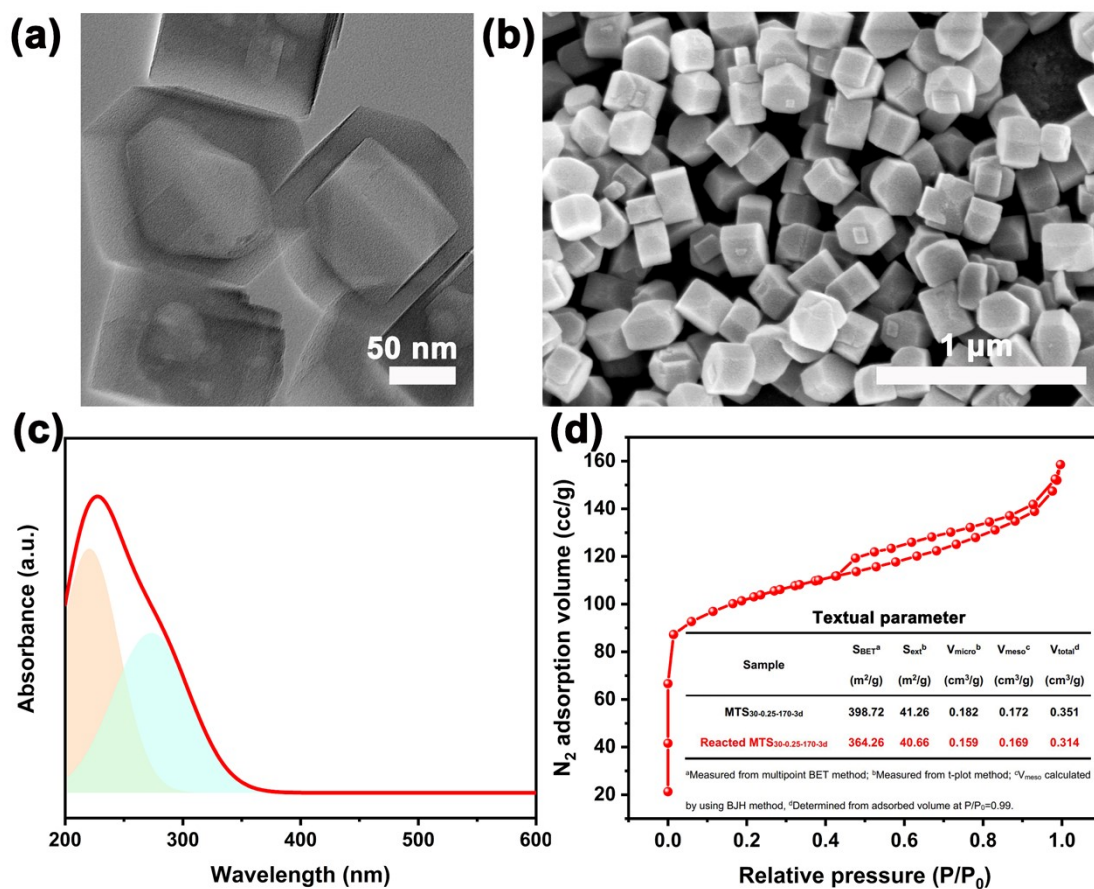

Figure S24. TEM images(a), SEM images (b), UV-vis spectra (c) and N<sub>2</sub> physisorption results (d) of recycled MTS<sub>30-0.25-170-3d</sub> after phenol hydroxylation.
